# Supplementary material
Source: publisher figshare collection journal article supplement (https://acs.figshare.com/ndownloader/files/18155027)
Supplement: Supplementary file 1 [file 18155027]

## Supporting Information

### Exploring a Fused 2-(Thiophen-2-yl)thieno[3,2-*b*]thiophene (T-TT) Building Block to Construct n-Type Polymer for High-Performance All-Polymer Solar Cells

Ning An<sup>†,‡,#</sup>, Huijuan Ran<sup>§,#</sup>, Yanfang Geng<sup>†</sup>, Qingdao Zeng<sup>†</sup>, Jianyong Hu<sup>\*,§</sup>, Jing Yang<sup>†</sup>, Yanming Sun<sup>\*,||</sup>, Xiaochen Wang<sup>†</sup>, Erjun Zhou<sup>\*,†,‡,⊥</sup>

<sup>†</sup>CAS Key Laboratory of Nanosystem and Hierarchical Fabrication, CAS Center for Excellence in Nanoscience, National Center for Nanoscience and Technology, Beijing 100190, China.

<sup>‡</sup>Center of Materials Science and Optoelectronics Engineering, University of Chinese Academy of Sciences, Beijing 100049, China.

<sup>§</sup>Shaanxi Key Laboratory for Advanced Energy Devices, School of Materials Science and Engineering, Shaanxi Normal University, Xi'an 710119, China.

<sup>||</sup>School of Chemistry, Beihang University, Beijing 100191, China

<sup>⊥</sup>Henan Institutes of Advanced Technology, Zhengzhou University, Zhengzhou 450003, China.

<sup>#</sup>These authors contribute equally to this work.

E-mail: [zhouej@nanoctr.cn](mailto:zhouej@nanoctr.cn); [hujianyong@snnu.edu.cn](mailto:hujianyong@snnu.edu.cn); [sunym@buaa.edu.cn](mailto:sunym@buaa.edu.cn)

### Methods

<sup>1</sup>H NMR spectra were obtained using Bruker 400 MHz and 500 MHz nuclear magnetic resonance (NMR). Molecular weights of the polymers were measured on Angilent Technologies PL-GPC 220 High Temperature Chromatograph at 150 °C using a calibration curve of polystyrene standards and 1,2,4-trichlorobenzene as the eluent. UV-vis absorption spectra of pristine and blend films were acquired with a Hitachi (model U-3010) UV-vis spectrophotometer. Cyclic voltammetry (CV) measurements were performed under nitrogen at a scan rate of 100 mV s<sup>-1</sup> using a Zahner IM6e Electrochemical workstation. A platinum plate coated with sample film, a platinum wire and a saturated Ag/AgCl electrode were employed as a working electrode, a counter electrode and a reference electrode, respectively. 0.1 M tetra-nbutylammonium hexafluorophosphate (Bu<sub>4</sub>NPF<sub>6</sub>) dissolved in anhydrous acetonitrile solution was employed as a supporting electrolyte and Ferrocene/ferrocenium (Fc/Fc<sup>+</sup>) is used as an internal standard. Atomic force microscopy (AFM) measurements were performed using a Dimension Icon AFM (Bruker) in the tapping mode. 2D-GIWAXS were conducted on a Xeuss SAXS/WAXS system with X-ray wavelength of 1.5418 Å. The

film samples were irradiated at a fixed angle of 0.2°. Transmission electron microscopy (TEM) measurements were performed on a Tecnai G2 F20 U-TWIN instrument (FEI Company, Hillsboro).

### **Organic Solar Cell Fabrication and Characterization**

Organic solar cells with inverted device configurations of ITO/ZnO/PBDB-T:PNDIs/MoO<sub>3</sub>/Ag and ITO/ZnO/J71:PNDIs/MoO<sub>3</sub>/Ag were fabricated. The ITO-coated glass substrates were firstly cleaned by ultrasonic treatment in detergent, deionized water, acetone and isopropyl alcohol for 30 minutes, respectively. After drying for one night, ZnO precursor solution was spin coated at 4000 rpm and the ZnO layer was generated at 200 °C for 15 min in ambient atmosphere. The active layers were spin-coated from a solution of PBDB-T:**PNDI-T-TT** with weight ratio of 2:1 in chlorobenzene, while the active layers were spin-coated from a solution of PBDB-T:**PNDI-TVT** with weight ratio of 1.5:1 in chlorobenzene. Solution with 0.5%, 0.75 % DPE was stirred overnight prior to cast. Other active layers were spin-coated from a solution of J71:**PNDI-T-TT** with weight ratio of 1.5:1 in chlorobenzene, while the active layers were spin-coated from a solution of J71:**PNDI-TVT** with weight ratio of 2:1 in chlorobenzene. Solution with 2% DPE was stirred overnight prior to cast. After spinning active layers, the blending films were annealed at 120°C for 10 minutes. The MoO<sub>3</sub> were deposited by sequential thermal evaporation of 3 nm followed by 90 nm of Ag. Current density voltage (*J-V*) characteristics were measured using a Keithley 2400 Source Measure Unit. The currents were measured under 100 mW cm<sup>-2</sup> simulated 1.5 Global (AM 1.5G) solar simulator (Enli Technology Co., Ltd, SS-F5-3A). The light intensity was calibrated by a standard Si solar cell (SRC-2020, Enli Technology Co., Ltd). EQE spectra were performed by using a QEX10 Solar Cell IPCE measurement system (PV Measurements, Inc.).

### **Space-Charge Limited Current Measurement**

The charge transport properties were investigated by space charge limited current (SCLC) measurement. The electron-only devices were fabricated with structures of ITO/ZnO/PBDB-T:PNDIs/ZrAcac/Al and ITO/ZnO/J71:PNDIs/ZrAcac/Al). The hole-only devices were fabricated with structures of: ITO/PEDOT:PSS/PBDB-T:PNDIs/MoO<sub>3</sub>/Ag and ITO/PEDOT:PSS/J71:PNDIs/MoO<sub>3</sub>/Ag). The *J-V* curves of devices were fitted by using the Mott–Gurney equation:  $J = 9\varepsilon_0\varepsilon_r\mu V^2/8L^3$ , in which *J* is the

current density,  $\varepsilon_0$  is the permittivity of free space,  $\varepsilon_r$  is the permittivity of the active layer,  $\mu$  is the hole mobility or electron mobility,  $V$  is the internal voltage of the device ( $V = V_{\text{appl}} - V_{\text{bi}}$ ), where  $V_{\text{appl}}$  is the applied voltage,  $V_{\text{bi}}$  is the offset voltage ( $V_{\text{bi}}$  is 0 V here), and  $L$  is the film thickness of the active layer. The electron mobility could be estimated from the slope of the  $\text{Log}(J)$ - $\text{Log}(V)$  curve.

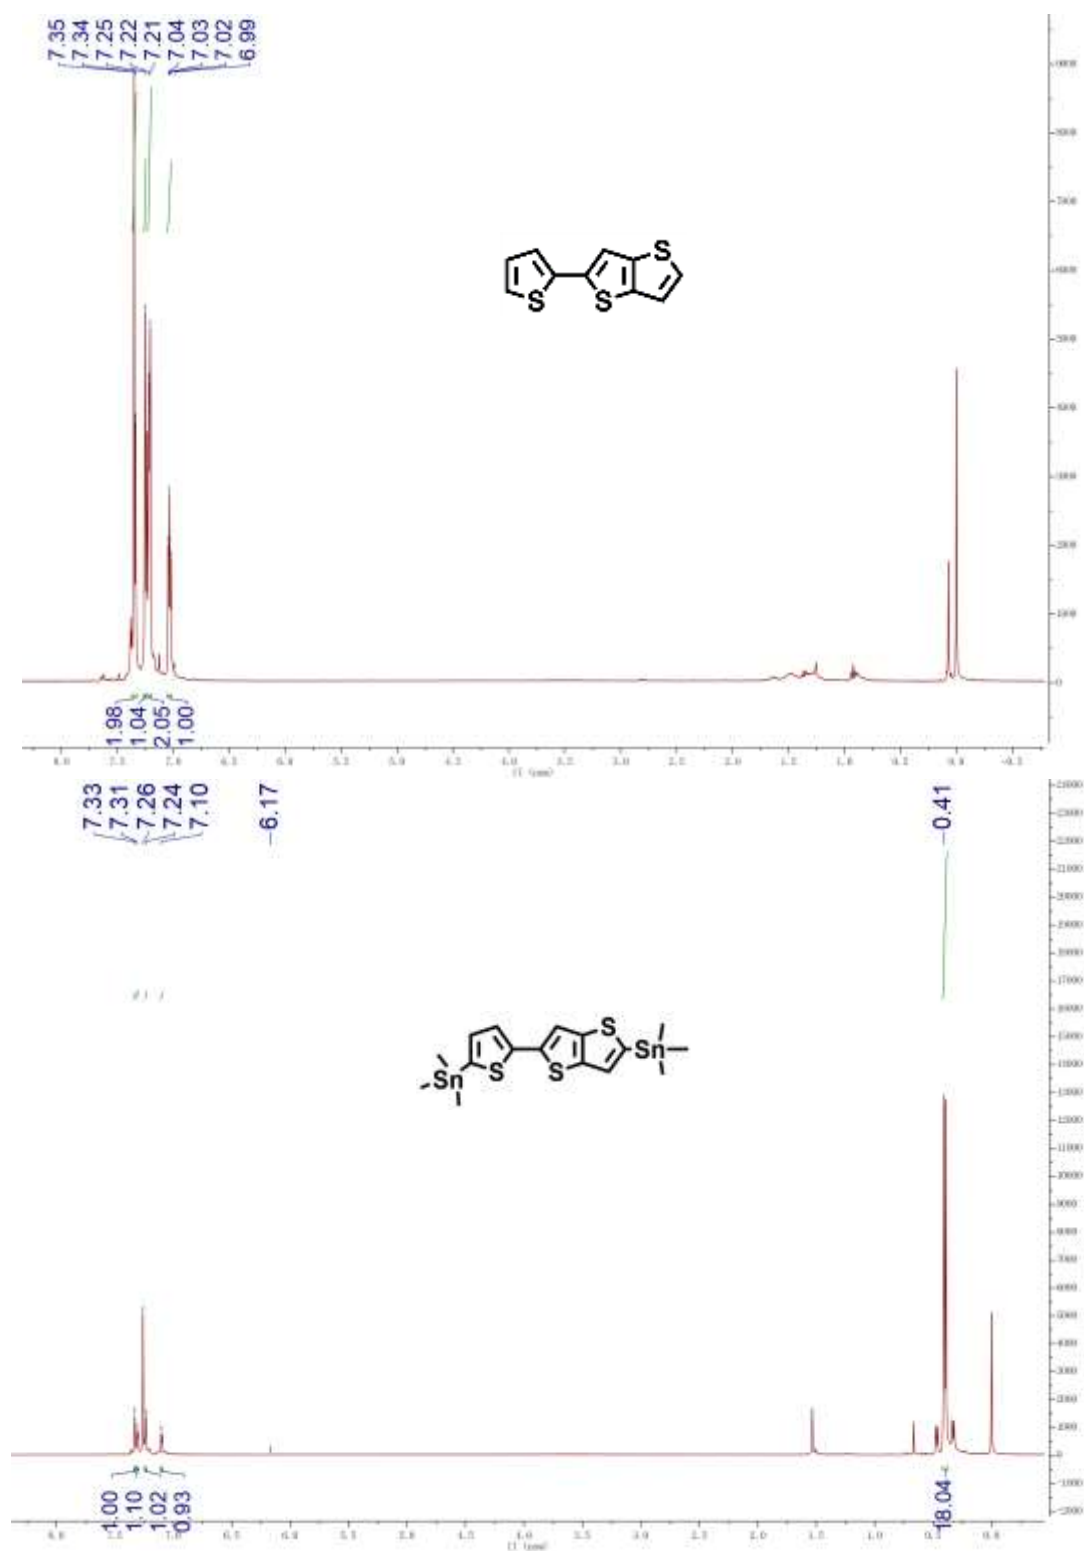

**Figure S1.**  $^1\text{H}$  NMR spectra of T-TT and T-TT-Sn (in  $\text{CDCl}_3$  at 25  $^\circ\text{C}$ ).

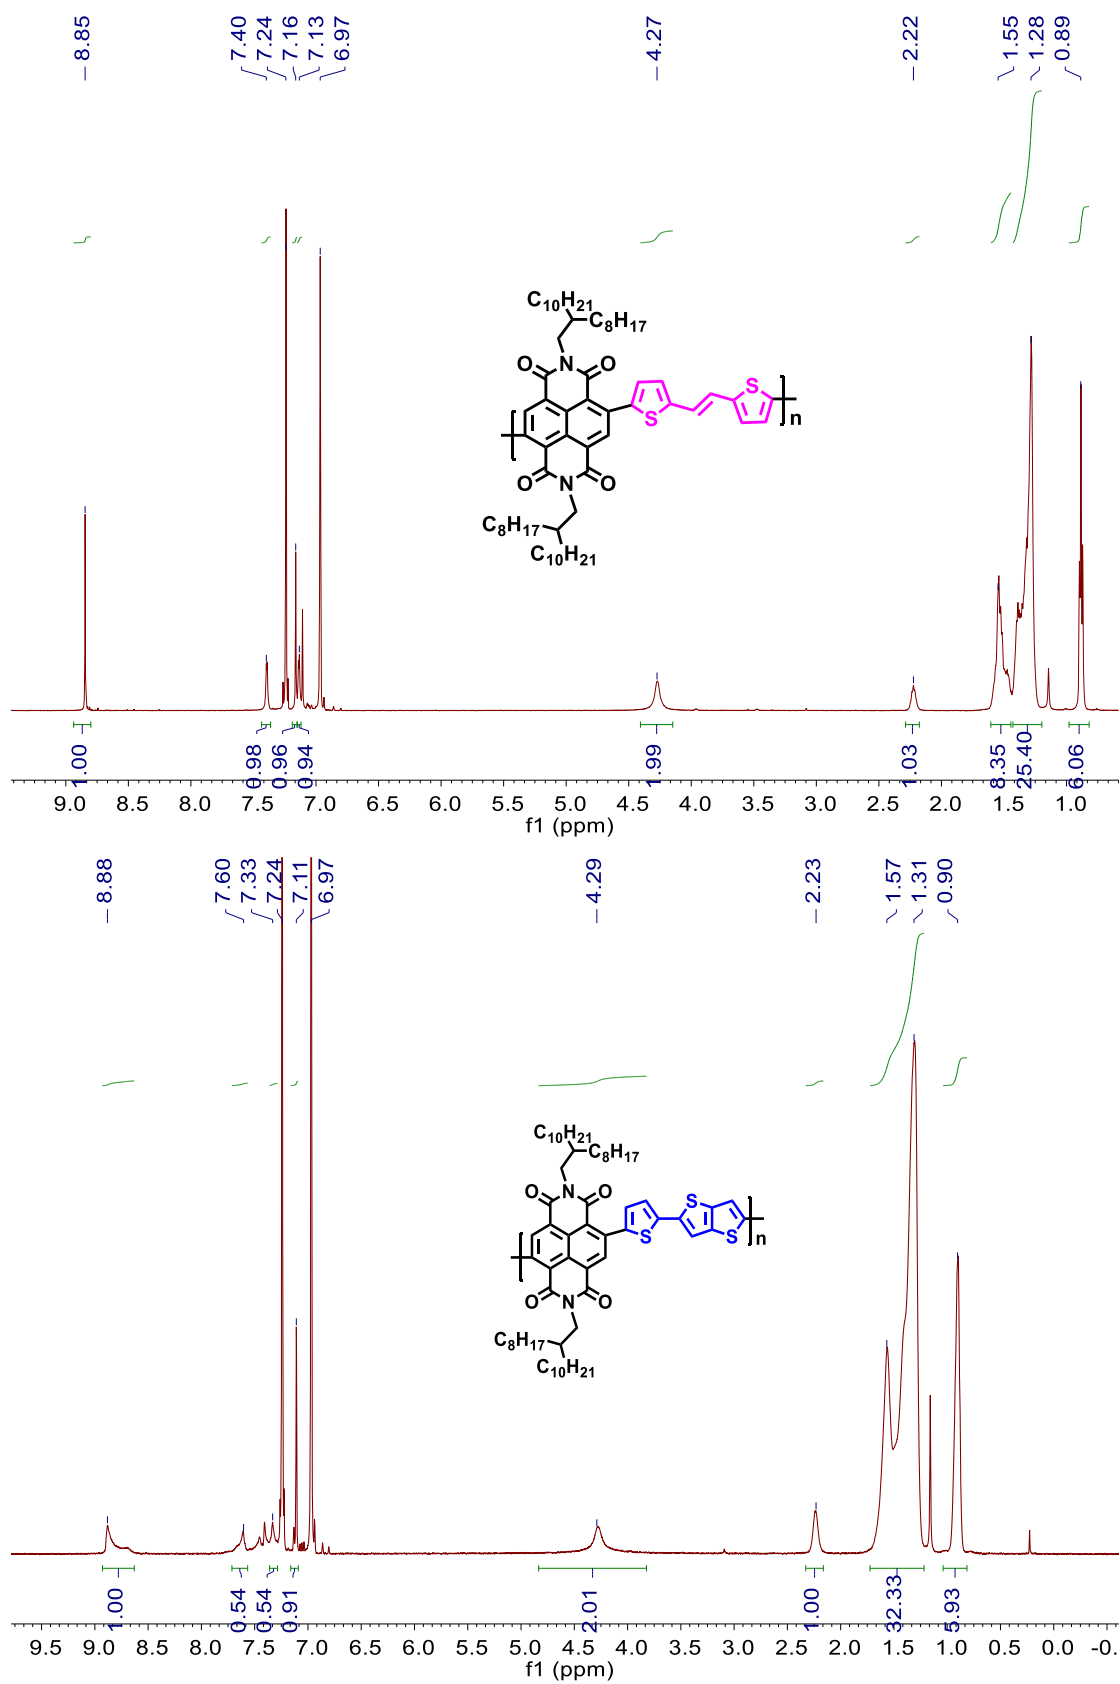

**Figure S2.**  $^1\text{H}$  NMR spectra of PNDI-TVT and PNDI-T-TT (in 1,2-dichlorobenzene- $d_4$  at 120  $^\circ\text{C}$ ).

## Cirrus GPC Sample Peak Report

Generated by: yugui

2018年12月21日 15:20

Workbook: E:\Cirrus Workbooks\o-DCB workfunction\20170606-GYT.plw

### Sample Details

Sample Name: 6

Acquired: 2018/12/21 15:11:30

By Analyst: yugui

Batch Name: Imported

Filename: E:\Cirrus Workbooks\o-DCB workfunction\imported-1034.cgrm

Concentration: 0.10 mg/ml

K of Sample: 14.1000

Injection Volume: 200.0 ul

Alpha of Sample: 0.7000

LIMS ID:

Bottle ID:

### Workbook Details

Eluent: DCB

Flow Rate: 1.00 ml/min

Column Set:

Column Set Length: 0 mm

Detector: RI

Temperature: 140

### Analysis Using Method: 20170606-baseline

Comments:

Results File: E:\Cirrus Workbooks\o-DCB workfunction\imported-1034.rst

### Calibration Used: 2017/6/8 15:43:34

Calibration Type: Narrow Standard

Curve Fit Used: 1

Calibration Curve:  $y = 13.117150 - 0.606883x^{*1}$

High Limit MW RT: 11.33 mins

Low Limit MW RT: 16.85 mins

High Limit MW: 1734370

Low Limit MW: 778

K: 14.1000

FRM Name:

Alpha: 0.7000

Flow Marker RT: 0.00 mins

FRCF: 1.0000

### MW Averages

Mp: 69712

Min: 59153

Mv: 83329

Mw: 88654

Mz: 131838

Mz+1: 184095

PD: 1.4987

### Distribution Plots

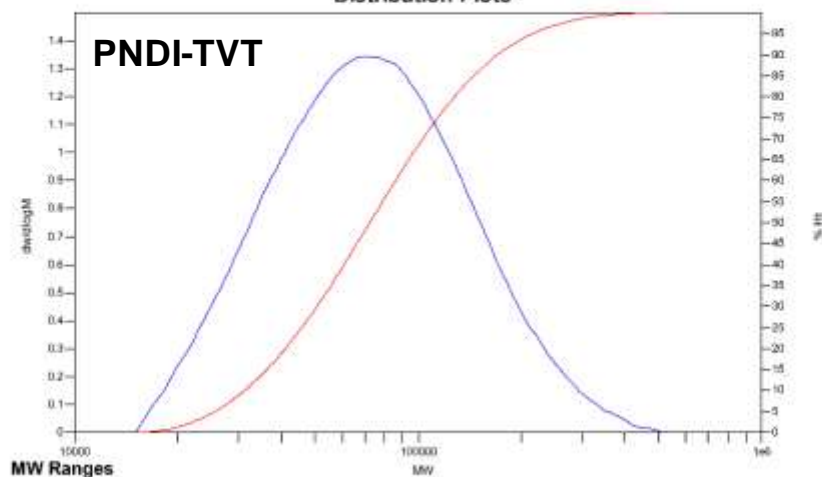

# **Cirrus GPC Sample Peak Report**

Generated by: yugui 2018年12月21日 15:20  
Workbook: E:\Cirrus Workbooks\io-DCB workfunction\20170606-GYT.plw

## **Sample Details**

Sample Name: 7  
Acquired: 2018/12/21 15:11:30 By Analyst: yugui  
Batch Name: Imported  
Filename: E:\Cirrus Workbooks\io-DCB workfunction\imported-1035.cgrm  
Concentration: 0.10 mg/ml K of Sample: 14.1000  
Injection Volume: 200.0 ul Alpha of Sample: 0.7000  
LIMS ID: Bottle ID:

## **Workbook Details**

Eluent: DCB Flow Rate: 1.00 ml/min  
Column Set: Column Set Length: 0 mm  
Detector: RI Temperature: 140

## **Analysis Using Method: 20170606-baseline**

Comments:

Results File: E:\Cirrus Workbooks\io-DCB workfunction\imported-1035.rst

## **Calibration Used: 2017/6/8 15:43:34**

Calibration Type: Narrow Standard Curve Fit Used: 1  
Calibration Curve:  $y = 13.117150 - 0.606863x^{*1}$

High Limit MW RT: 11.33 mins Low Limit MW RT: 16.85 mins  
High Limit MW: 1734370 Low Limit MW: 778  
K: 14.1000 FRM Name:  
Alpha: 0.7000 Flow Marker RT: 0.00 mins  
FRCF: 1.0000

## **MW Averages**

Mp: 85969 Mn: 67708 Mw: 103826 Mw: 112179  
Mz: 184627 Mz+1: 283677 PD: 1.6568

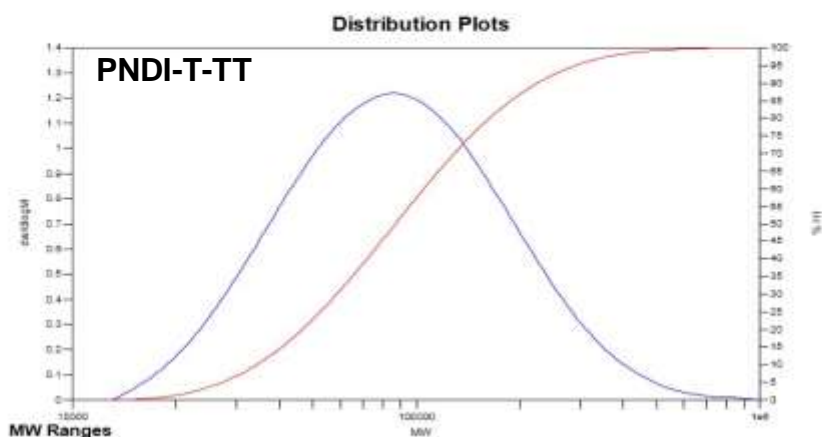

**Figure S3.** GPC curves of polymer **PNDI-TV**T and **PNDI-T-TT**.

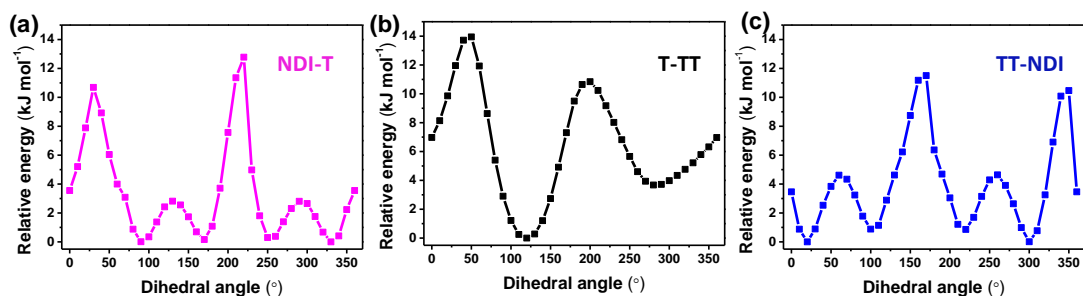

**Figure S4.** Potential energy surface scan of NDI-T, T-TT and TT-NDI.

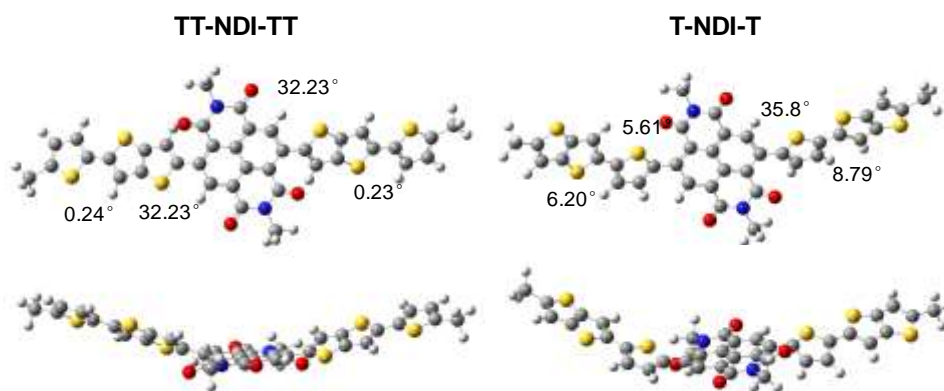

**Figure S5.** Optimized structures of different connections T-NDI-T and TT-NDI-TT with dihedral angles.

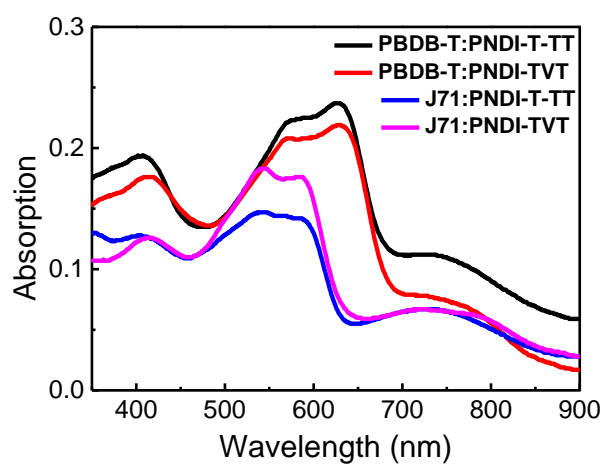

**Figure S6.** UV-vis absorption spectra of blend films on quartz plates.

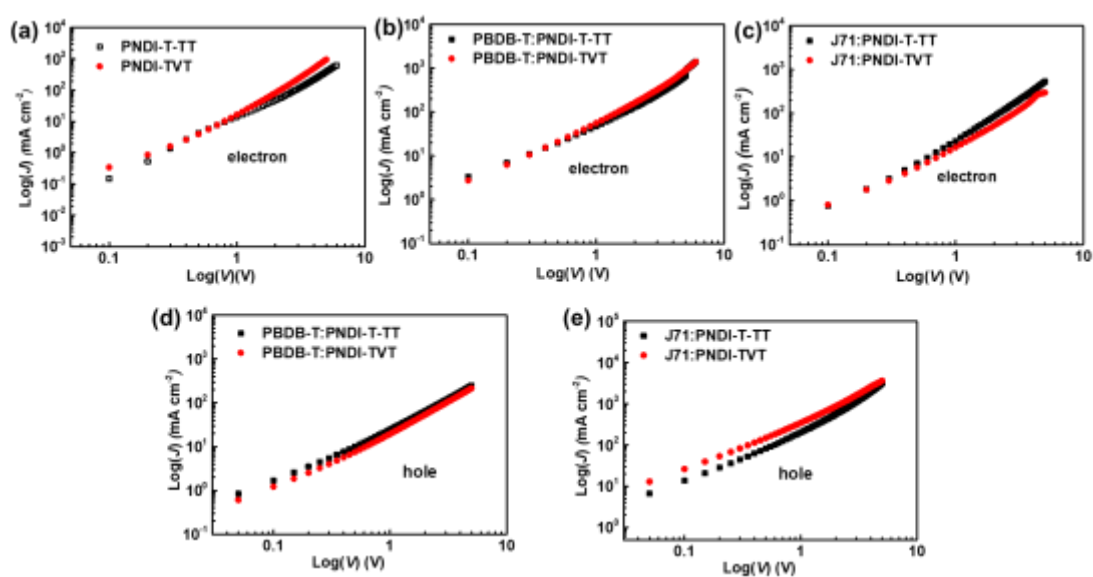



**Figure S7.** (a) SCLC fittings curves of **PNDI-T-TT** and **PNDI-TVT** electron devices. (b-e) SCLC fittings curves of electron-only and hole-only device based on **PNDI-T-TT** and **PNDI-TVT** blend films with PBDB-T and J71.

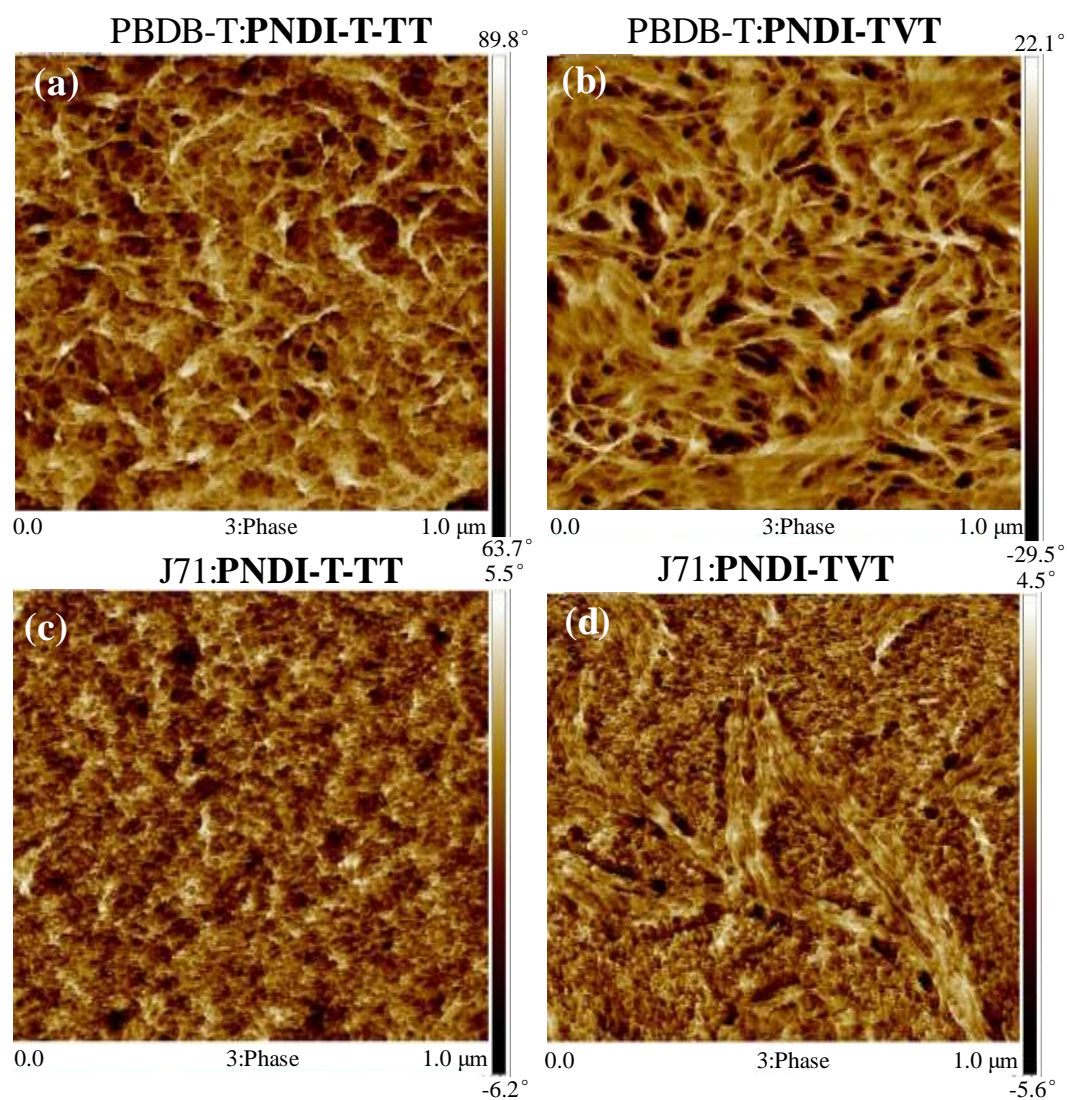

**Figure S8.** AFM phase images of (a) PBDB-T:PNDI-T-TT, (b) PBDB-T:PNDI-TVT, (c) J71:PNDI-T-TT and (d) J71:PNDI-TVT.

**Table S1** Photovoltaic performance of **PBDB-T:PNDIs** based OSCs under the illumination of AM 1.5 G, 100 mW·cm<sup>-2</sup> (solvent: chlorobenzene, annealing temperature 120°C). Average values with standard deviation were obtained from measurements of 12 devices measurements of 12 devices.

| D:A                         | D/A ratio (w/w) | V <sub>OC</sub> (V)   | J <sub>SC</sub> (mA·cm <sup>-2</sup> ) | FF (%)                | PCE (%)                      |
|-----------------------------|-----------------|-----------------------|----------------------------------------|-----------------------|------------------------------|
| PBDBT:<br><b>PNDI-T-TT</b>  | 2:1             | 0.84<br>(0.84±0.00)   | 10.97<br>(10.69±0.28)                  | 0.57<br>(0.57±0.00)   | <b>5.28</b><br>(5.10±0.18)   |
|                             | 2.5:1           | 0.84<br>(0.84±0.01)   | 11.00<br>(10.70±0.30)                  | 0.55<br>(0.55±0.00)   | 5.14<br>(4.90±0.24)          |
|                             | 3:1             | 0.84<br>(0.84±0.00)   | 10.81<br>(10.61±0.20)                  | 0.55<br>(0.56±0.01)   | 5.03<br>(4.96±0.07)          |
| PBDB-T:<br><b>PNDI-TVT</b>  | 1:1.5           | 0.82<br>(0.83±0.01)   | 5.18<br>(5.00±0.18)                    | 0.57<br>(0.56±0.01)   | 2.49<br>(2.47±0.02)          |
|                             | 1:1             | 0.83<br>(0.83±0.00)   | 5.93<br>(5.83±0.10)                    | 0.53<br>(0.53±0.01)   | 2.61<br>(2.54±0.07)          |
|                             | 1.5:1           | 0.86<br>(0.85±0.01)   | 7.60<br>(7.22±0.38)                    | 0.56<br>(0.55±0.01)   | <b>3.51</b><br>(3.39±0.12)   |
| D:A                         | Additives       | V <sub>OC</sub> (V)   | J <sub>SC</sub> (mA·cm <sup>-2</sup> ) | FF (%)                | PCE (%)                      |
| PBDB-T:<br><b>PNDI-T-TT</b> | 2% DPE          | 0.83<br>(0.820±0.010) | 9.33<br>(9.227±0.103)                  | 0.64<br>(0.625±0.015) | 4.95<br>(4.72±0.23)          |
|                             | 1% DPE          | 0.83<br>(0.829±0.001) | 9.86<br>(9.741±0.119)                  | 0.61<br>(0.611±0.001) | 4.97<br>(4.93±0.04)          |
|                             | 0.75% DPE       | 0.84<br>(0.837±0.003) | 11.72<br>(11.62±0.10)                  | 0.62<br>(0.837±0.003) | <b>6.09</b><br>(6.091±0.001) |
|                             | 0.5% DPE        | 0.84<br>(0.837±0.003) | 11.33<br>(11.36±0.03)                  | 0.63<br>(0.623±0.007) | 5.95<br>(5.88±0.07)          |
| PBDB-T:<br><b>PNDI-TVT</b>  | 2% DPE          | 0.85<br>(0.850±0.002) | 7.78<br>(7.84±0.06)                    | 0.61<br>(0.588±0.013) | 3.99<br>(3.92±0.07)          |
|                             | 1% DPE          | 0.85<br>(0.852±0.001) | 8.44<br>(8.39±0.05)                    | 0.58<br>(0.585±0.005) | 4.22<br>(4.19±0.03)          |
|                             | 0.5% DPE        | 0.85<br>(0.850±0.001) | 8.70<br>(8.60±0.10)                    | 0.57<br>(0.569±0.005) | <b>4.24</b><br>(4.18±0.06)   |

**Table S2** Photovoltaic performance of the OSCs based on the **J71:PNDIs** under the illumination of AM 1.5 G, 100 mW·cm<sup>-2</sup> (solvent: chlorobenzene, annealing temperature 120°C). Average values with standard deviation were obtained from measurements of 12 devices.

| D:A                 | D/A ratio (w/w) | V <sub>OC</sub> (V)    | J <sub>SC</sub> (mA·cm <sup>-2</sup> ) | FF (%)                | PCE (%)                    |
|---------------------|-----------------|------------------------|----------------------------------------|-----------------------|----------------------------|
| <b>J71:PNDI-TT</b>  | 1.5:1           | 0.88<br>(0.88±0.00)    | 7.50<br>(7.45±0.05)                    | 0.56<br>(0.56±0.01)   | 3.71<br>(3.69±0.02)        |
|                     | 1.5:1           | 0.88<br>(0.88±0.00)    | 7.59<br>(7.34±0.25)                    | 0.56<br>(0.57±0.01)   | <b>3.74</b><br>(3.68±0.06) |
|                     | 1.5:1           | 0.88<br>(0.88±0.00)    | 7.12<br>(7.08±0.04)                    | 0.57<br>(0.57±0.04)   | 3.57<br>(3.56±0.01)        |
| <b>J71:PNDI-TVT</b> | 2:1             | 0.88<br>(0.88±0.00)    | 3.47<br>(3.43±0.04)                    | 0.46<br>(0.46±0.00)   | <b>1.41</b><br>(1.39±0.02) |
|                     | 1.5:1           | 0.86<br>(0.87±0.01)    | 3.27<br>(3.22±0.05)                    | 0.49<br>(0.49±0.00)   | 1.37<br>(1.36±0.01)        |
|                     | 1:1             | 0.83<br>(0.85±0.02)    | 3.08<br>(2.88±0.20)                    | 0.45<br>(0.47±0.02)   | 1.16<br>(1.13±0.03)        |
| D:A                 | Additives       | V <sub>OC</sub> (V)    | J <sub>SC</sub> (mA·cm <sup>-2</sup> ) | FF (%)                | PCE (%)                    |
| <b>J71:PNDI-TT</b>  | 3% DPE          | 0.880<br>(0.879±0.001) | 7.53<br>(7.50±0.03)                    | 0.63<br>(0.623±0.007) | 4.14<br>(4.09±0.05)        |
|                     | 2% DPE          | 0.878<br>(0.879±0.001) | 8.21<br>(8.14±0.07)                    | 0.62<br>(0.622±0.002) | <b>4.47</b><br>(4.44±0.03) |
|                     | 1% DPE          | 0.871<br>(0.871±0.000) | 8.78<br>(8.62±0.16)                    | 0.55<br>(0.556±0.006) | 4.24<br>(4.12±0.12)        |
| <b>J71:PNDI-TVT</b> | 3% DPE          | 0.882<br>(0.883±0.001) | 4.51<br>(4.40±0.11)                    | 0.48<br>(0.487±0.007) | 1.99<br>(1.93±0.06)        |
|                     | 2% DPE          | 0.881<br>(0.880±0.001) | 5.28<br>(5.22±0.06)                    | 0.50<br>(0.499±0.001) | <b>2.32</b><br>(2.29±0.03) |
|                     | 1% DPE          | 0.871<br>(0.873±0.002) | 5.23<br>(5.22±0.01)                    | 0.48<br>(0.476±0.004) | 2.20<br>(2.17±0.03)        |
